# Supplementary material
Source: Springer Nature journal article supplement (https://www.springermedizin.de/resource/supplementary/12882_2014_792_MOESM1_ESM.pdf/9454720)

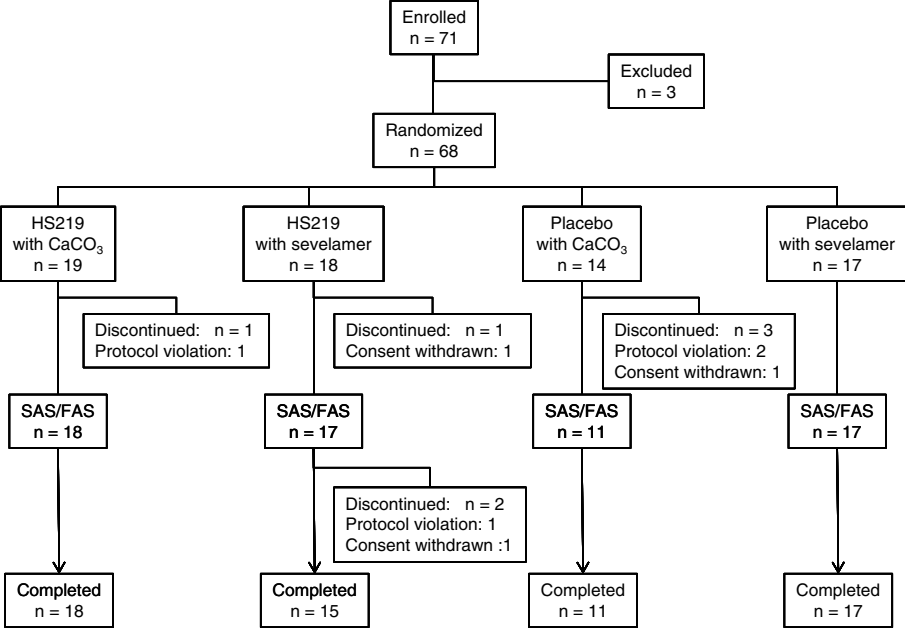

Supplement: MOESM1 [file 9454720]
